# Supplementary material for: A topotactic structural transformation synthetic route for β-NaYF4upconversion nanocrystals from YF3at room temperature
Source: Royal Society of Chemistry journal article supplement (doi:10.1039/d2ce01268e), 2022-11-15
Supplement: d2ce01268e1.pdf [file d2ce01268e1.pdf]

# A Structural Topotactic Transformation Synthetic Route for $\beta$ -NaYF<sub>4</sub> Upconversion Nanocrystals from YF<sub>3</sub> at Room Temperature

*Baiqi Shao, Mei Yang, Fangfu Ye*

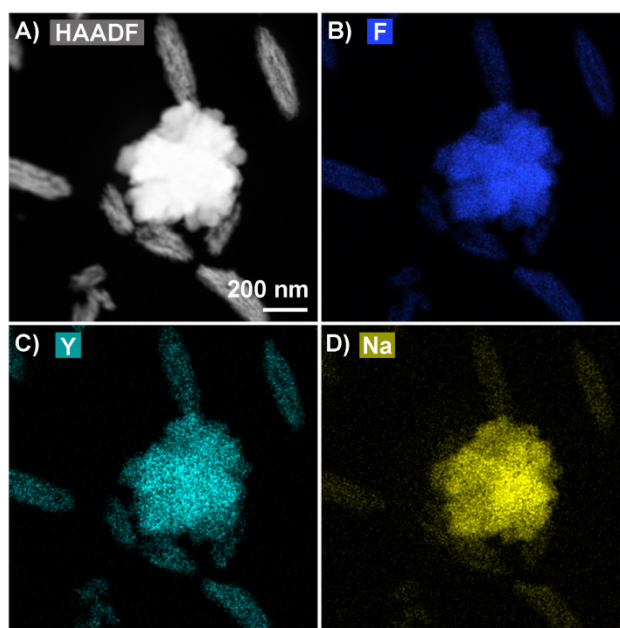

**Figure S1** Element mapping of (B) F, (C) Y, and (D) Na elements image of the product at 6 h.

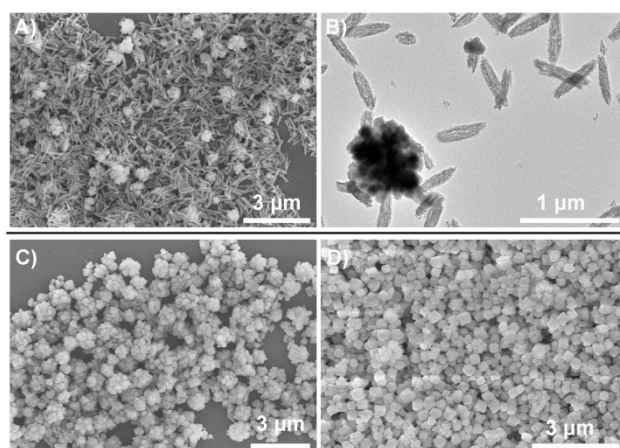

**Figure S2** SEM images of the products obtained at (A) 18 h, (C) 24 h, (D) 32 h, and (B) corresponding TEM image of the product obtained at 18 h.

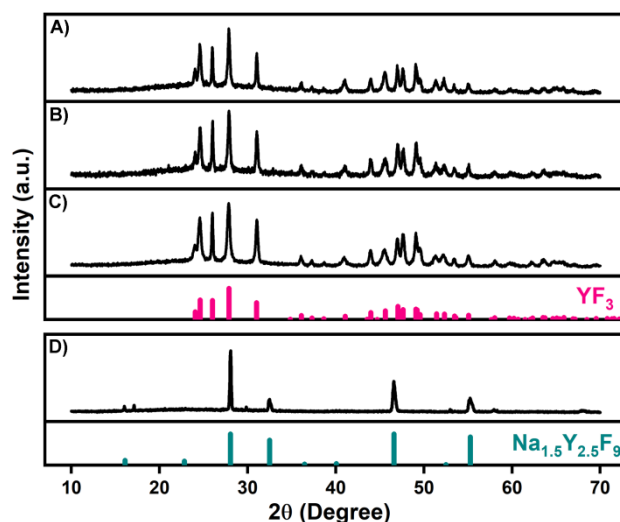

**Figure S3** XRD patterns of final products synthesized under different conditions: (A) 160 °C for 48 h with  $\text{YF}_3$ :  $\text{NaF}$ =1: 2 (mole ratio), (B) 160 °C for 48 h with  $\text{YF}_3$ :  $\text{NaF}$ =1: 3, (C) 200 °C for 48 h with  $\text{YF}_3$ :  $\text{NaF}$ =1: 3, and (D) 160 °C for 48 h with  $\text{YF}_3$ :  $\text{NaF}$ =1: 6.

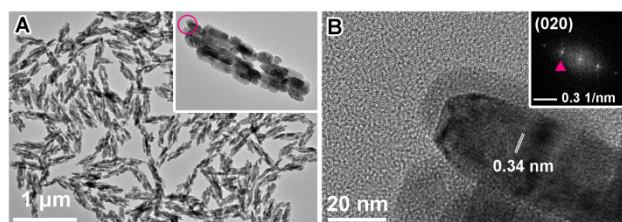

**Figure S4** TEM (A) and HRTEM (B) images of the products synthesized at 160 °C for 48 h with  $\text{YF}_3$ :  $\text{NaF}$ =1: 2 or 1: 3. It can be seen that the chain-like nanostructure is composed of oriented nanorods. The distinct lattice fringes with d spacing of 0.34 nm can be indexed to  $\text{YF}_3$  (020) lattice plane, which is agree with that of the  $\text{YF}_3$  nanospindle precursor.

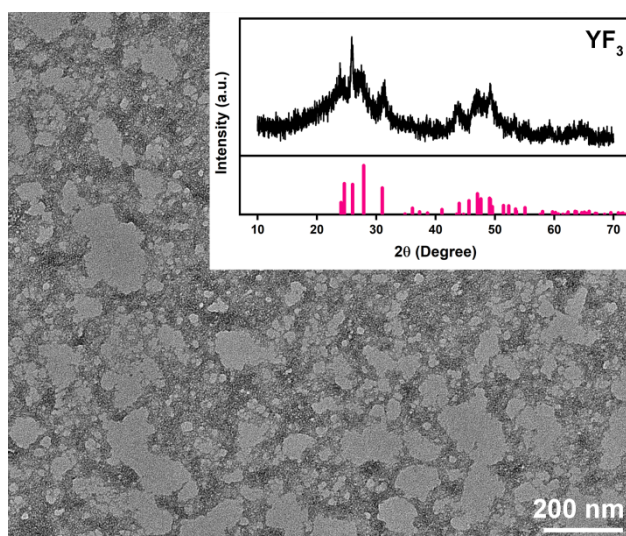

**Figure S5** TEM image and corresponding XRD pattern of the  $\text{YF}_3$  precursor obtained with reaction time for 15 min.

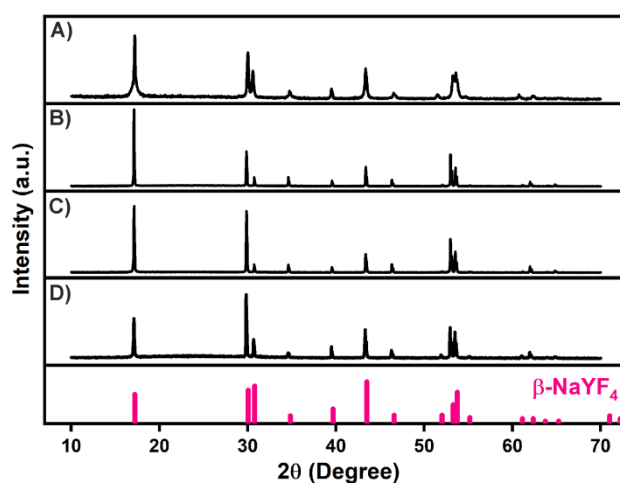

**Figure S6** XRD patterns of the  $\beta\text{-NaYF}_4$  products synthesized using ultra small  $\text{YF}_3$  nanoparticles under different conditions: (A) room temperature with  $\text{YF}_3$ :  $\text{NaF}$ =1: 6 (mole ratio), (B) 160 °C for 12 h with  $\text{YF}_3$ :  $\text{NaF}$ =1: 2 (mole ratio), (C) 160 °C for 12 h with  $\text{YF}_3$ :  $\text{NaF}$ =1: 4, and (D) 160 °C for 12 h with  $\text{YF}_3$ :  $\text{NaF}$ =1: 6.
